# Supplementary material
Source: HighWire-hosted journal article supplement (https://ard.bmj.com/content/81/12/1654)
Supplement: inline-supplementary-material-3 [file inline-supplementary-material-3.pdf]

**2022 AMERICAN COLLEGE OF RHEUMATOLOGY / EUROPEAN ALLIANCE OF ASSOCIATIONS FOR RHEUMATOLOGY**  
**CLASSIFICATION CRITERIA FOR TAKAYASU'S ARTERITIS**

**CONSIDERATIONS WHEN APPLYING THESE CRITERIA**

- These classification criteria should be applied to classify the patient as having Takayasu's arteritis when a diagnosis of medium-vessel or large-vessel vasculitis has been made
- Alternate diagnoses mimicking vasculitis should be excluded prior to applying the criteria

**ABSOLUTE REQUIREMENTS**

Age ≤ 60 years at time of diagnosis

Evidence of vasculitis on imaging<sup>1</sup>

**ADDITIONAL CLINICAL CRITERIA**

|                                                       |    |
|-------------------------------------------------------|----|
| Female sex                                            | +1 |
| Angina or ischemic cardiac pain                       | +2 |
| Arm or leg claudication                               | +2 |
| Vascular bruit <sup>2</sup>                           | +2 |
| Reduced pulse in upper extremity <sup>3</sup>         | +2 |
| Carotid artery abnormality <sup>4</sup>               | +2 |
| Systolic blood pressure difference in arms ≥ 20 mm Hg | +1 |

**ADDITIONAL IMAGING CRITERIA**

|                                                                               |    |
|-------------------------------------------------------------------------------|----|
| Number of affected arterial territories (select one) <sup>5</sup>             |    |
| One arterial territory                                                        | +1 |
| Two arterial territories                                                      | +2 |
| Three or more arterial territories                                            | +3 |
| Symmetric involvement of paired arteries <sup>6</sup>                         | +1 |
| Abdominal aorta involvement with renal or mesenteric involvement <sup>7</sup> | +3 |

**Sum the scores for 10 items, if present. A score of ≥ 5 points is needed for the classification of TAKAYASU'S ARTERITIS.**
